# Supplementary material
Source: publisher figshare collection journal article supplement (https://rs.figshare.com/ndownloader/files/14456051)

**-SUPPLEMENTARY MATERIAL-**

**for**

**Imaging of Transition Charge Densities Involving**

**Carbon Core Excitations by All X-ray**

**Sum-Frequency Generation**

Daeheum Cho,<sup>\*,†,‡</sup> J  r  my R. Rouxel,<sup>¶,§</sup> Markus Kowalewski,<sup>||</sup> Jin Yong Lee,<sup>\*,‡</sup>  
and Shaul Mukamel<sup>\*,†</sup>

†*Department of Chemistry and Physics and Astronomy, University of California, Irvine,  
California 92697, United States*

<sup>‡</sup>Department of Chemistry, Sungkyunkwan University, Suwon 16419, Korea

¶Laboratory of Ultrafast Spectroscopy, École Polytechnique Fédérale de Lausanne, CH-1015  
Lausanne, Switzerland

§SwissFEL, Paul Scherrer Institut, 5232 Villigen PSI, Switzerland

||*Department of Physics, Stockholm University, AlbaNova University Center, 10691  
Stockholm, Sweden*

E-mail: daeheumc@uci.edu; jinylee@skku.edu; smukamel@uci.edu

# Contents

|                                                                                                                     |     |
|---------------------------------------------------------------------------------------------------------------------|-----|
| S1 MO shapes and Transition Charge Densities                                                                        | S3  |
| S2 Attosecond Charge Migration due to Core Coherences and Femtosecond<br>Charge Migration due to Valence Coherences | S6  |
| S3 Effect of the Phase Cycling Protocol                                                                             | S17 |

## S1 MO shapes and Transition Charge Densities

### Core Molecular Orbitals

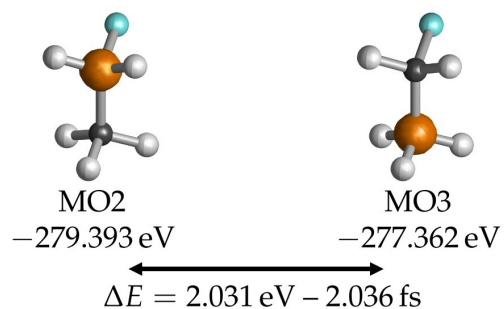

### Valence Molecular Orbitals

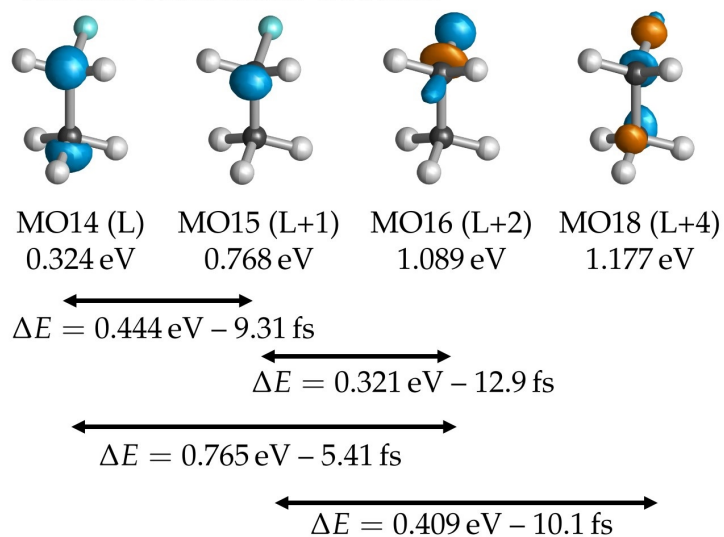

Figure S1: Core and valence MO shapes, energies, and energy differences. L: LUMO,  $L+n=\text{LUMO}+n$ .

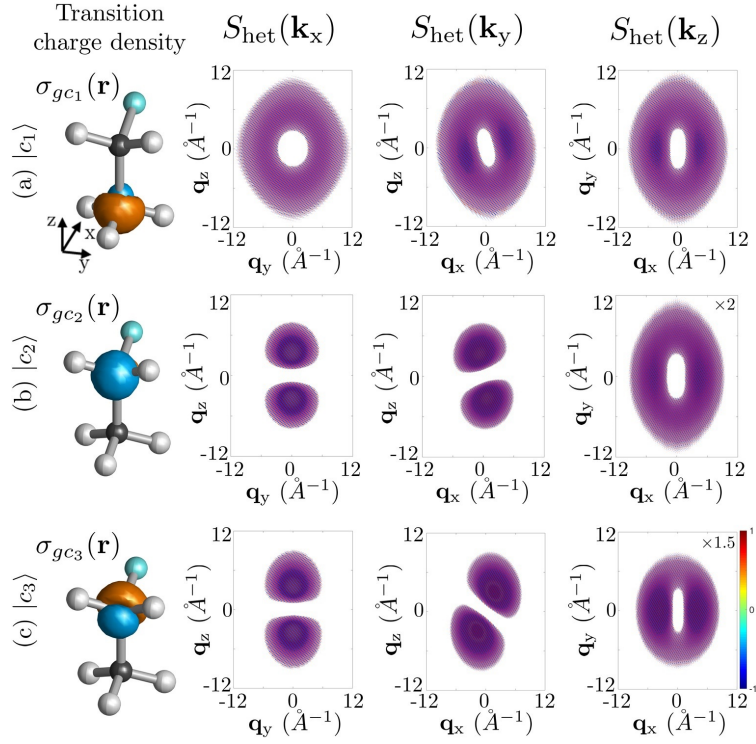

Figure S2: Static heterodyne imaging  $S_{\text{het}}$  of transition charge density  $\sigma_{gc_i}$  responsible for (a)  $|c_1\rangle$ , (b)  $|c_2\rangle$ , and (c)  $|c_3\rangle$  states calculated at the LR-REW-TDDFT/B3LYP/6-31+G\* level (blue: electron, orange: hole density; isovalue of 0.01).



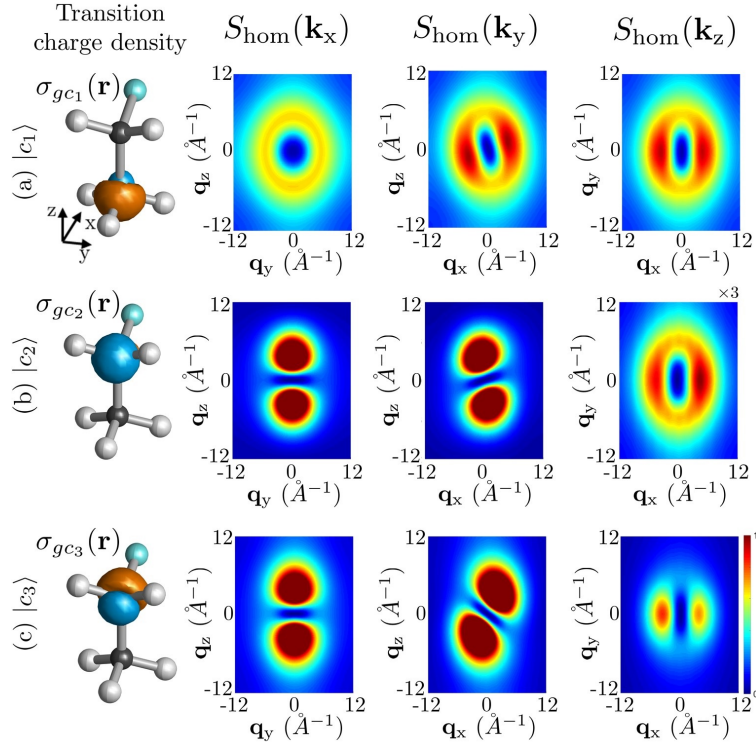

Figure S3: Static homodyne imaging  $S_{\text{hom}}$  of transition charge density  $\sigma_{gc_i}$  responsible for (a)  $|c_1\rangle$ , (b)  $|c_2\rangle$ , and (c)  $|c_3\rangle$  states calculated at the LR-REW-TDDFT/B3LYP/6-31+G\* level (blue: electron, orange: hole density; isovalue of 0.01).

## **S2    Attosecond Charge Migration due to Core Coher- ences and Femtosecond Charge Migration due to Valence Coherences**

# Attosecond charge migration in Scenario A at $T_1$

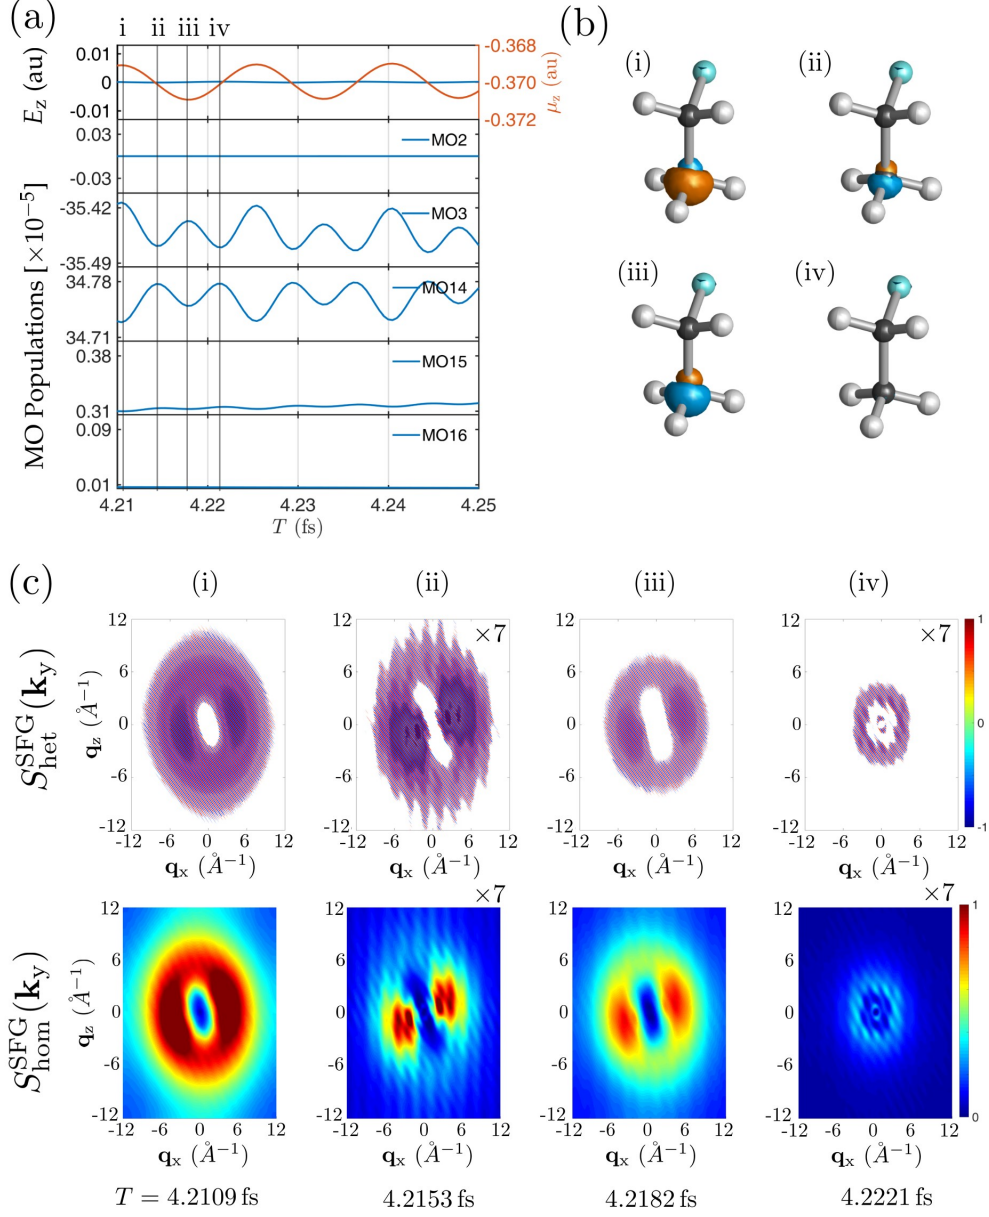

Figure S4: RT-TDDFT simulation of the electron-hole dynamics around  $T_1$  following  $|c_1\rangle$  excitation of fluoroethane. (a) Time-dependent  $\mu_z$  and populations of dominant core and valence MOs. Key points are marked as i–iv. (b) Electron-hole densities. Blue: electron, orange: hole density. (c) Heterodyne and homodyne Diffraction signals.

## Attosecond charge migration in Scenario A at $T_2$

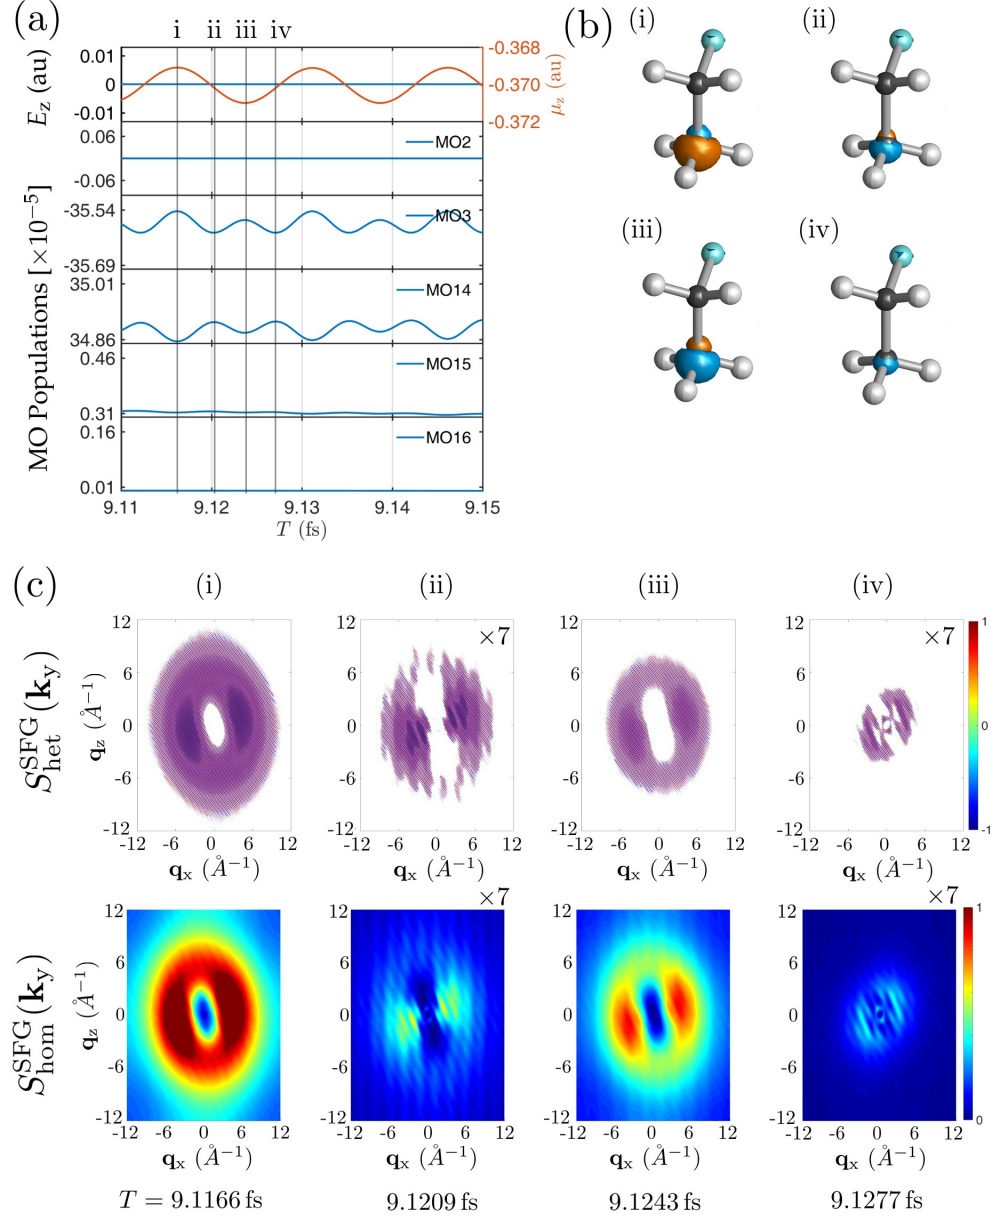

Figure S5: Same as Figure S4 but for Scenario A at  $T_2$ .

# Attosecond charge migration in Scenario A at $T_3$

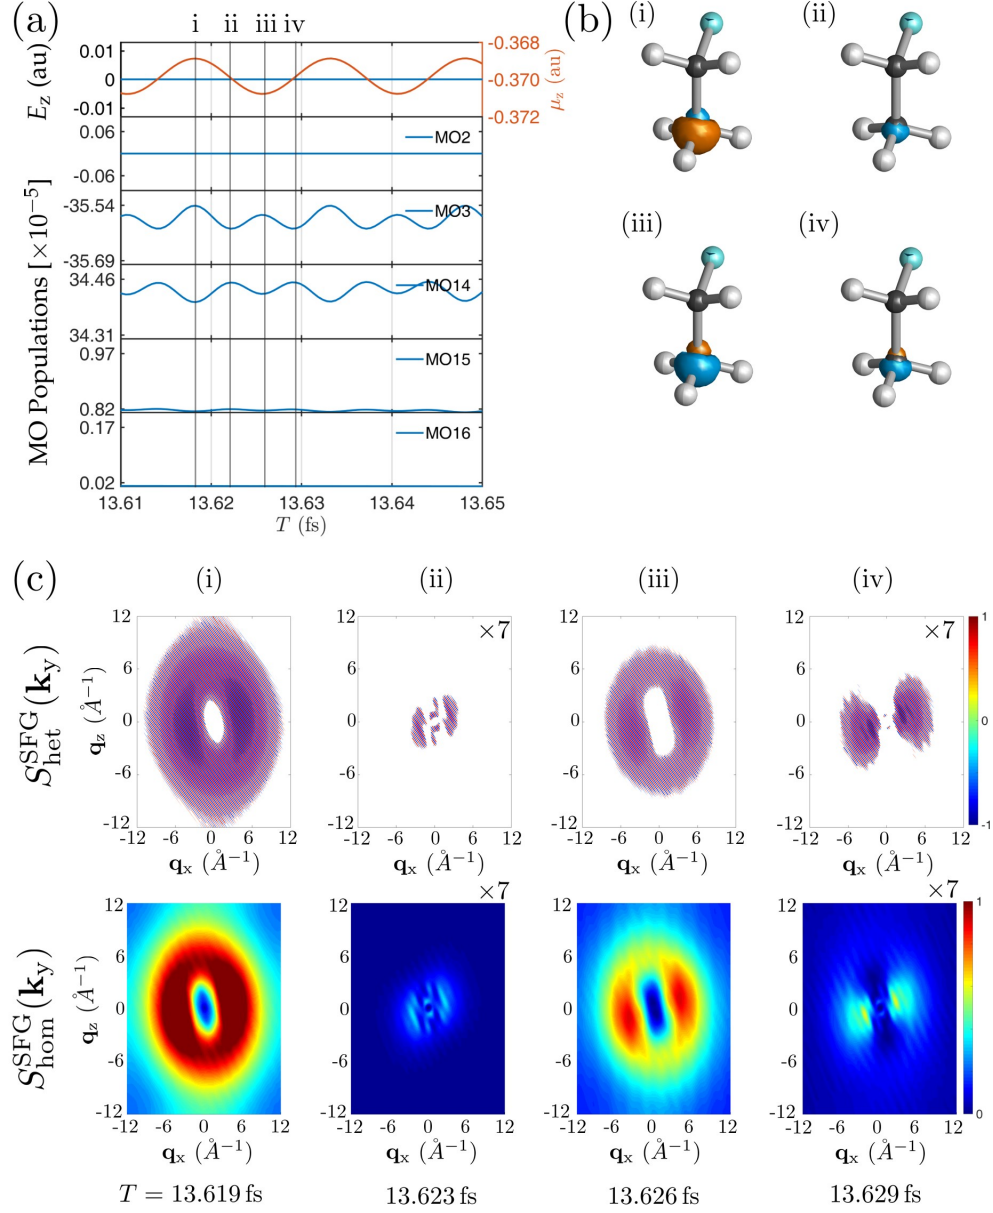

Figure S6: Same as Figure S4 but for Scenario A at  $T_3$ .

# Attosecond charge migration in Scenario B at $T_1$

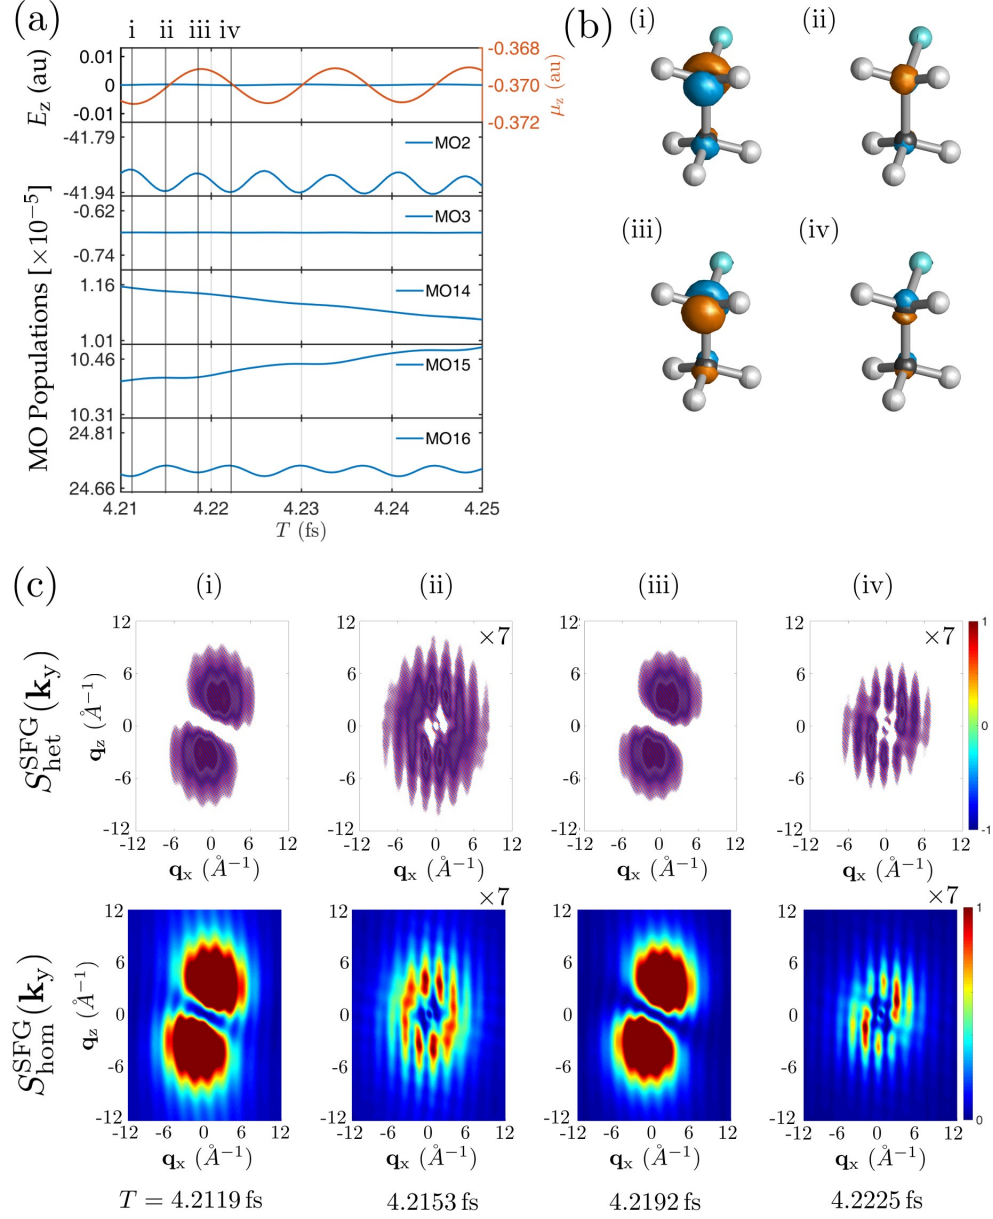

Figure S7: Same as Figure S4 but for Scenario B at  $T_1$ .

## Attosecond charge migration in Scenario B at $T_2$

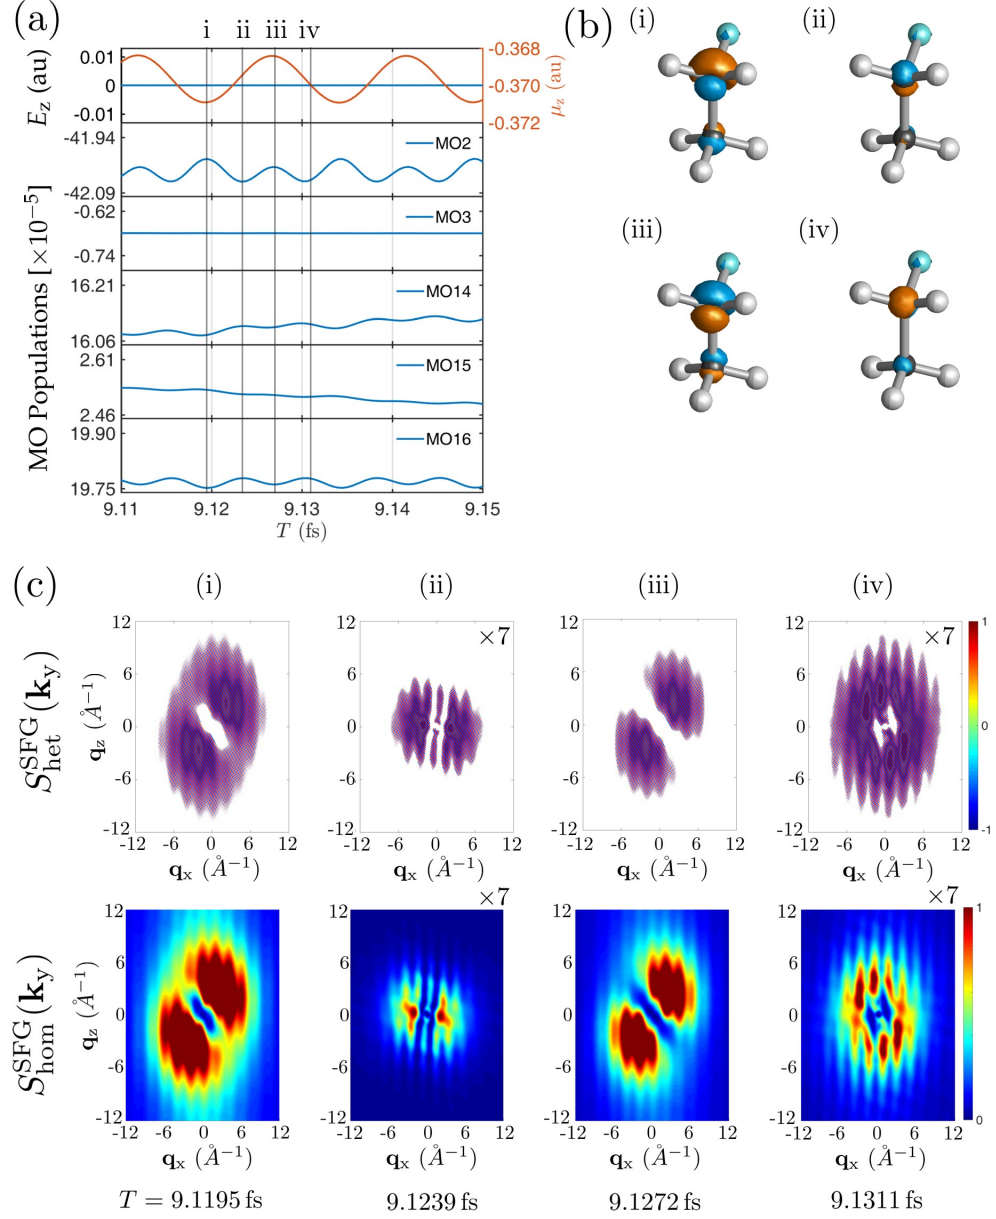

Figure S8: Same as Figure S4 but for Scenario B at  $T_2$ .



# Attosecond charge migration in Scenario B at $T_3$

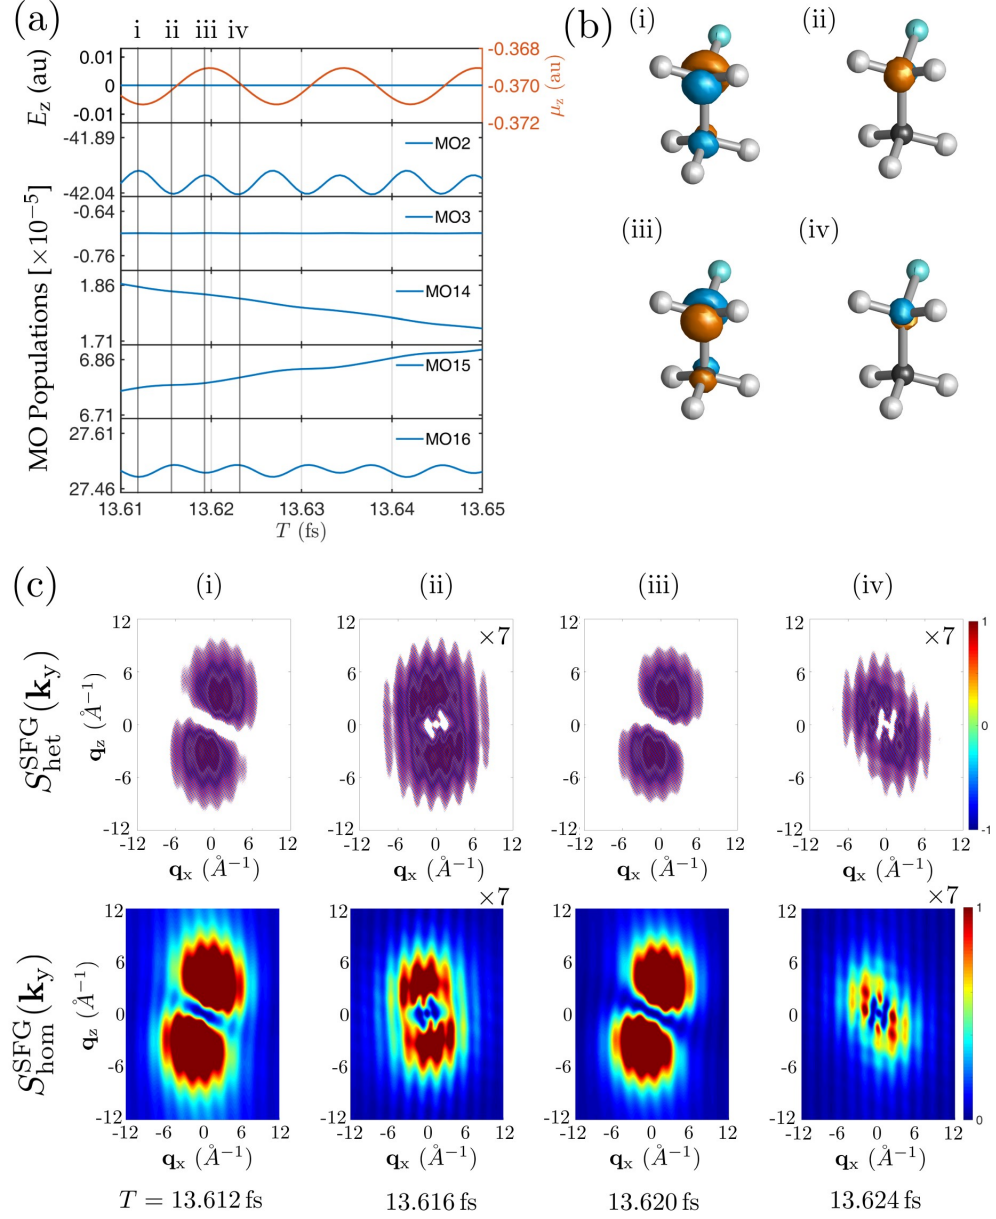

Figure S9: Same as Figure S4 but for Scenario B at  $T_3$ .



# Attosecond charge migration in Scenario C at $T_1$

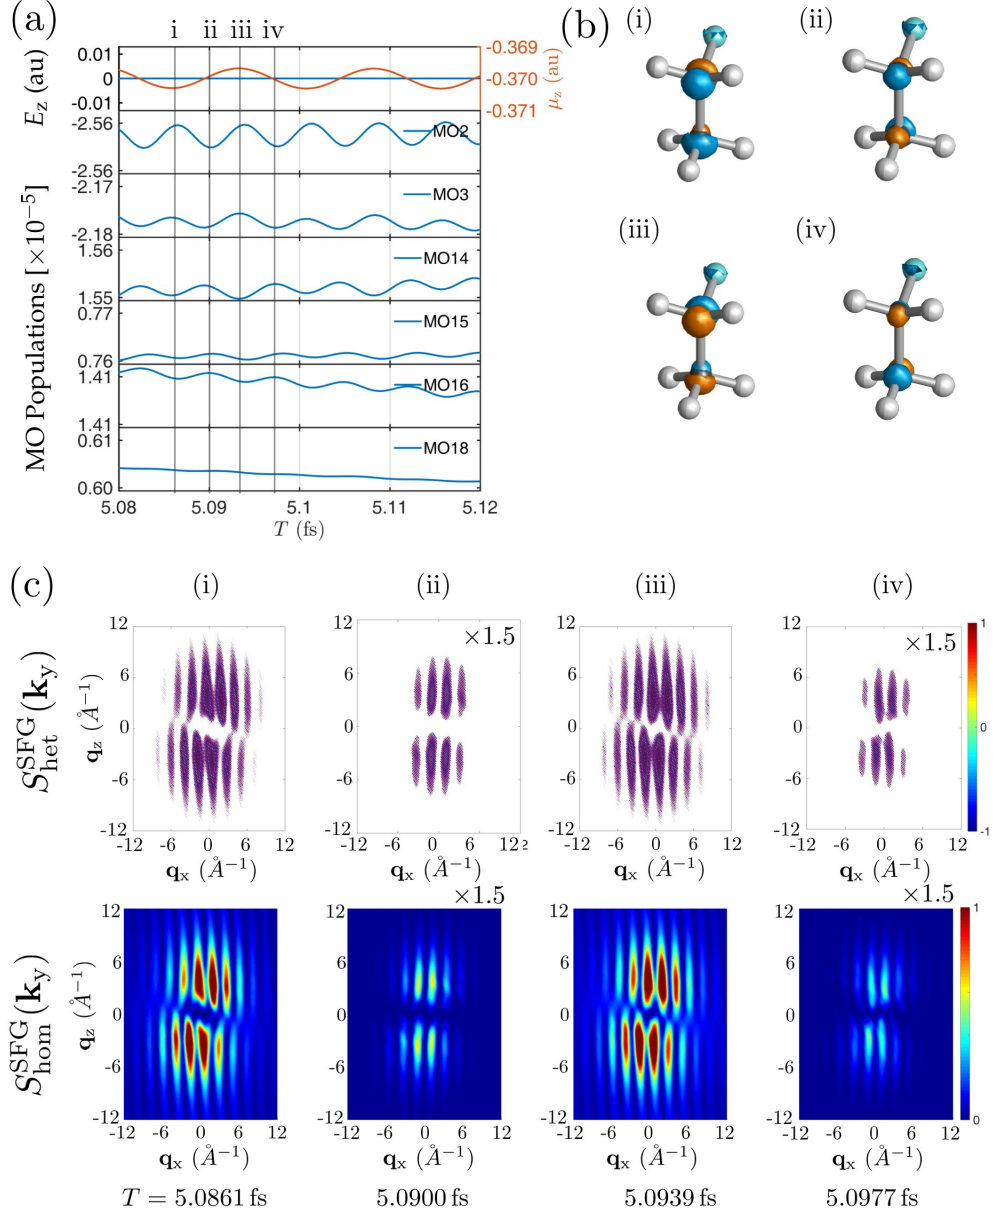

Figure S10: Same as Figure S4 but for Scenario C at  $T_1$ .

## Attosecond charge migration in Scenario C at $T_2$

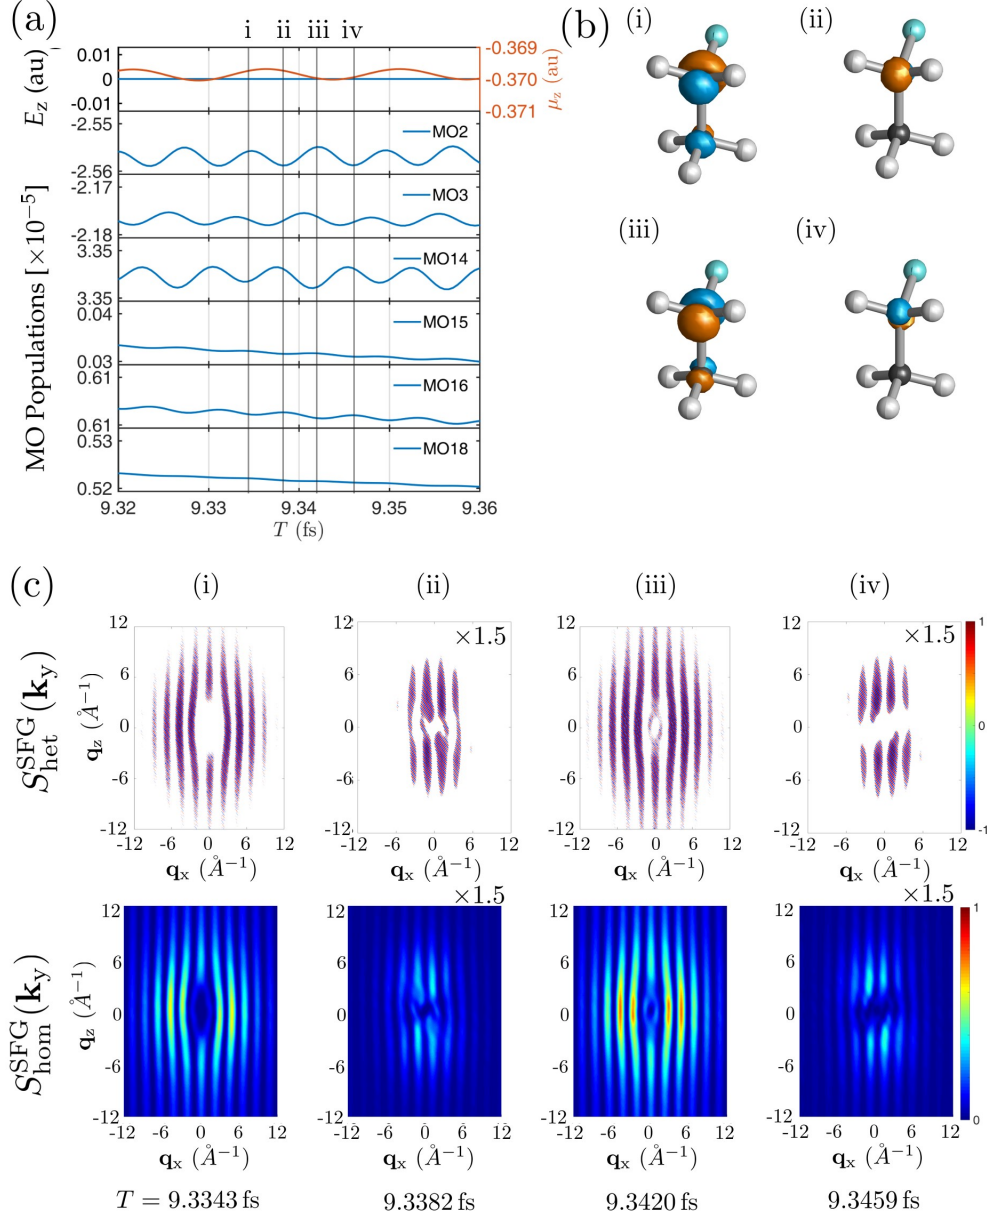

Figure S11: Same as Figure S4 but for Scenario C at  $T_2$ .

### Attosecond charge migration in Scenario C at $T_3$

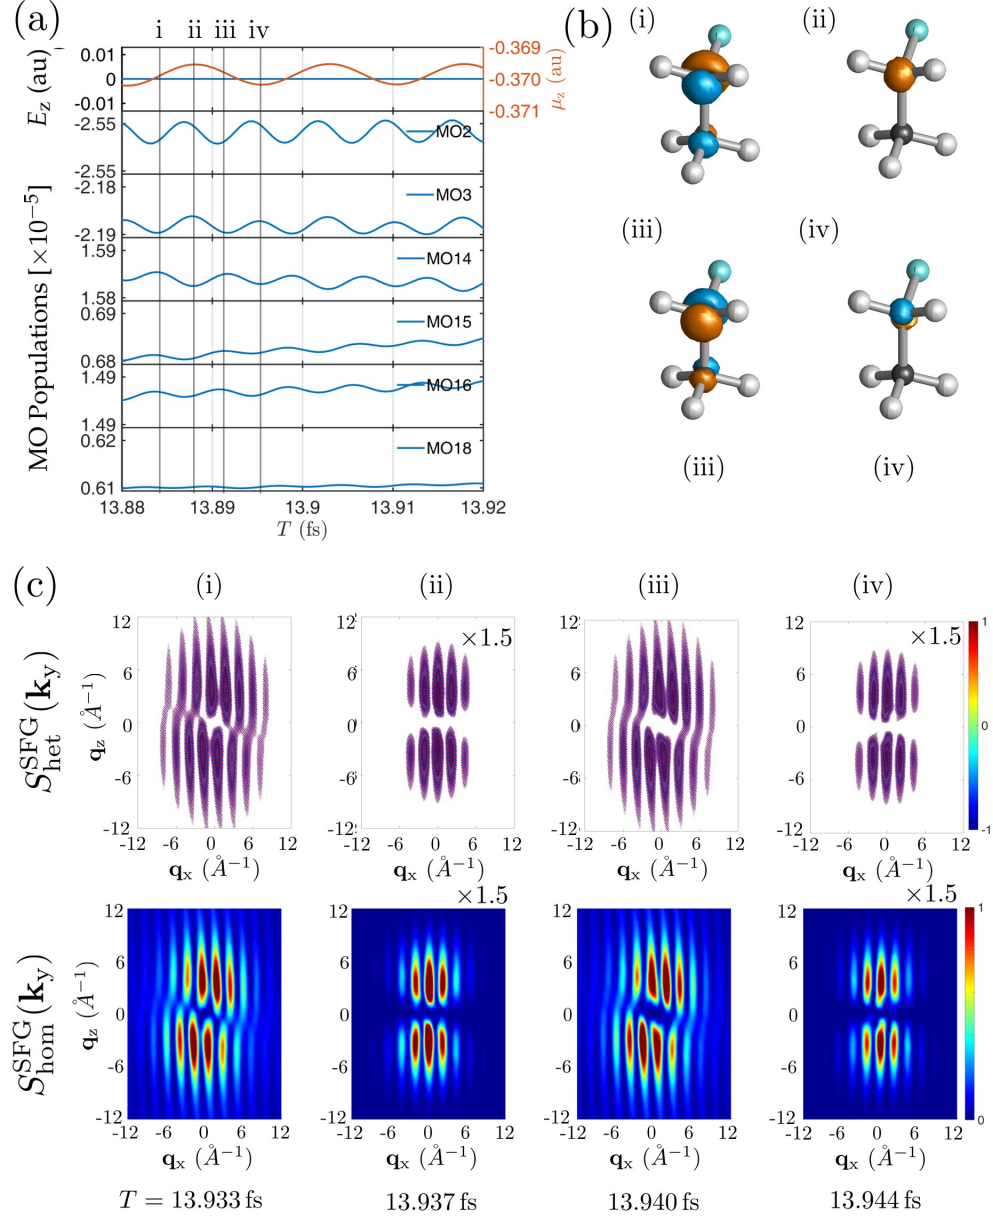

Figure S12: Same as Figure S4 but for Scenario C at  $T_3$ .

## Femtosecond Charge migration

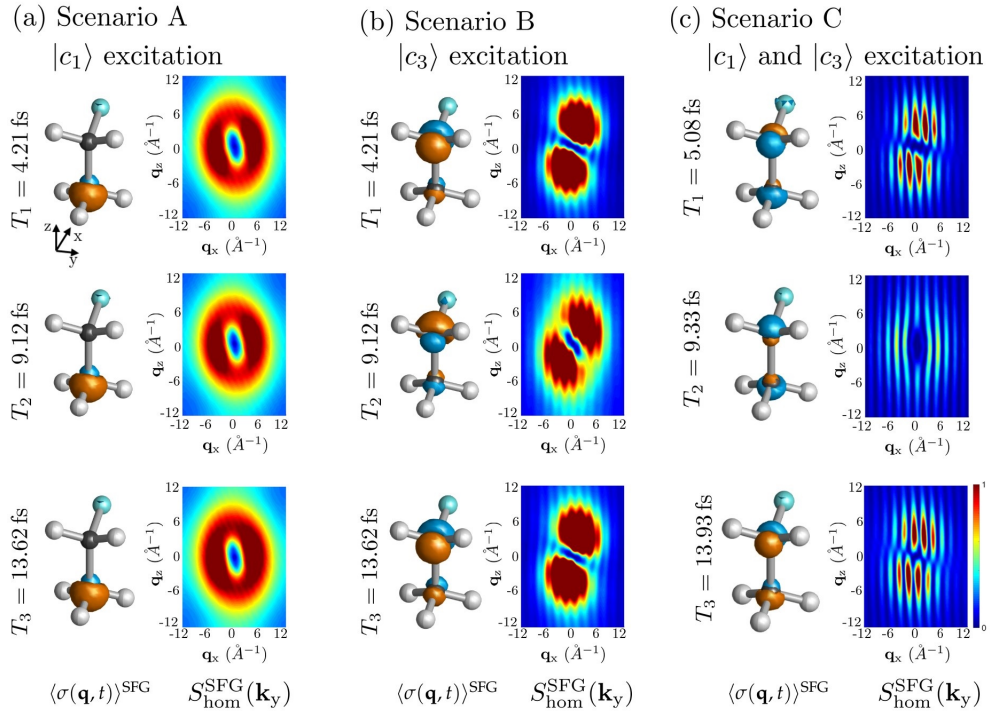

Figure S13: Charge migration following the (a) scenario A;  $|c_1\rangle$  excitation, (b) scenario B;  $|c_3\rangle$  excitation, and (c) scenario C;  $|c_1\rangle$ – $|c_3\rangle$  excitations and the corresponding homodyne diffraction signals.

## S3 Effect of the Phase Cycling Protocol

Scenario A,  $|c_1\rangle$  excitation

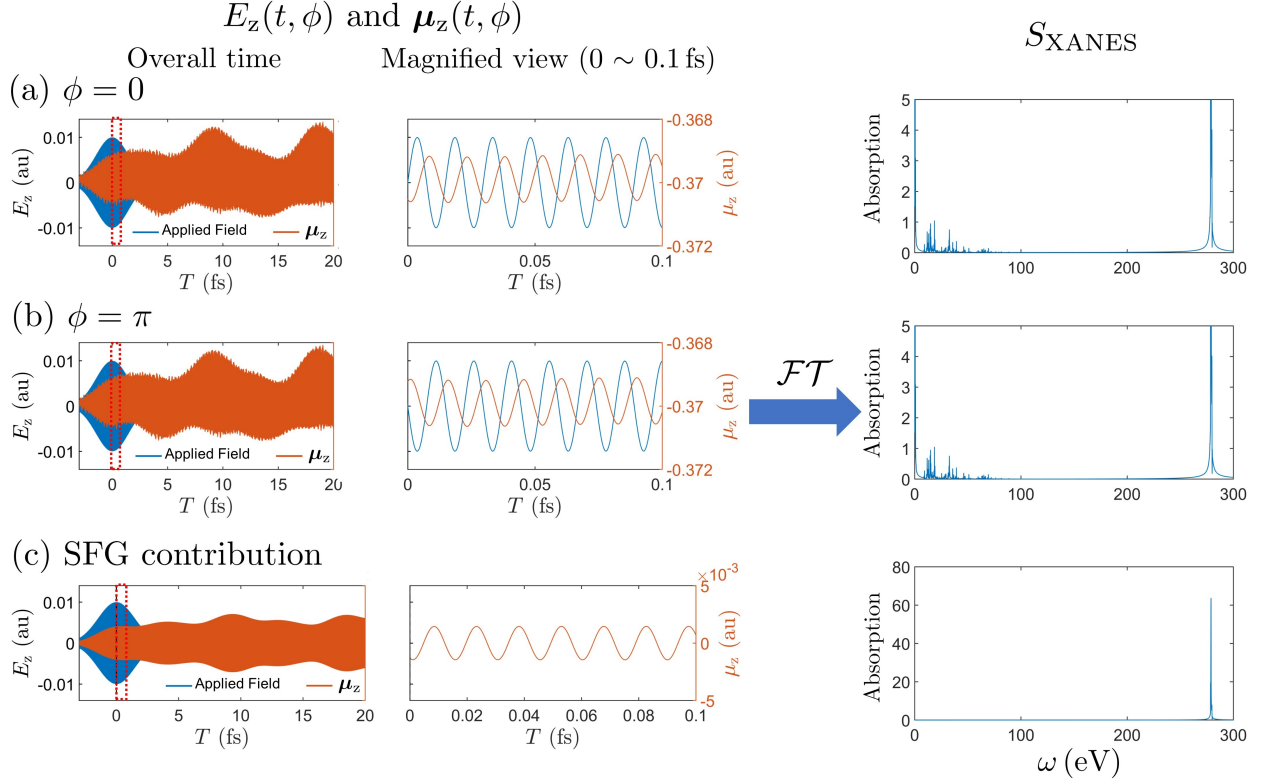

Figure S14: RT-TDDFT simulation of the  $E_z(t, \phi)$ ,  $\mu_z(t, \phi)$ , and the corresponding absorption spectrum under field phase (a)  $\phi = 0$ , (b)  $\phi = \pi$ , and (c) the SFG contribution obtained by eq. 2.9 following the Scenario A.

## Scenario B, $|c_3\rangle$ excitation

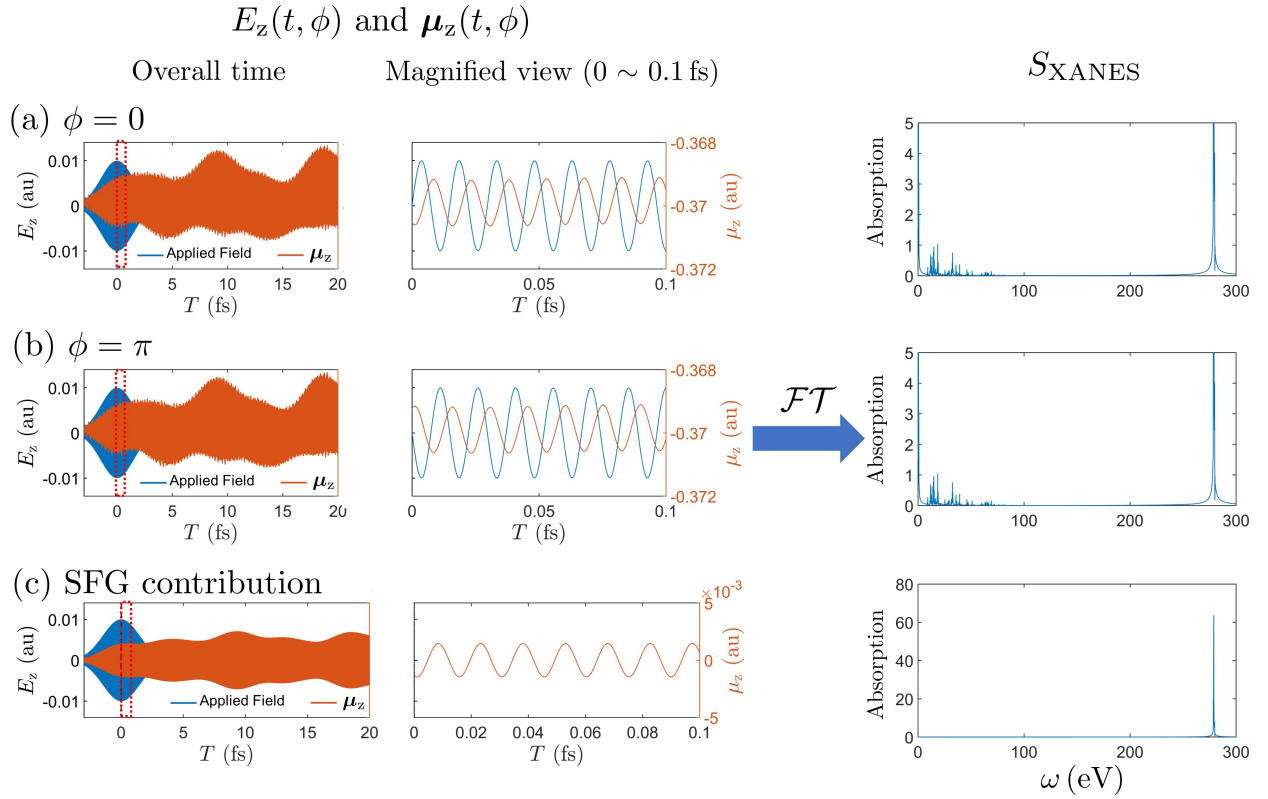

Figure S15: Same as Figure S14 but for Scenario B.

## Scenario C, $|c_1\rangle - |c_3\rangle$ excitation

$E_z(t, \phi)$  and  $\mu_z(t, \phi)$

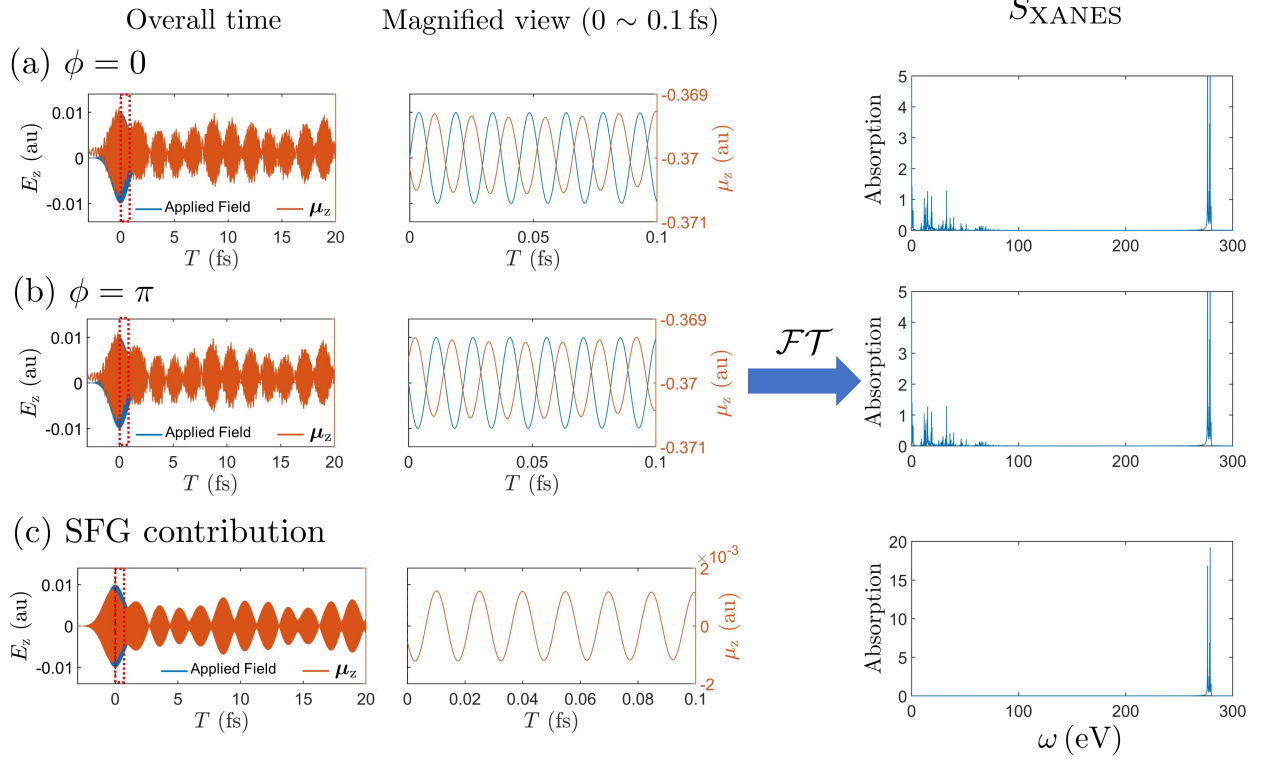

Supplement: Supplementary file 1 [file 14456051]
